# Supplementary material
Source: Research Square preprint supplement (doi:10.21203/rs.3.rs-9688202/v1)
Supplement: Supplementary file 1 [file 33c330f0cc4c39d49a9f96af.xlsx]

## Sheet: readme
	Supplemental Data for: Satellite-derived methane emissions reveal persistent gaps in global oil and gas mitigation performance
	Omara et al.
	Notes:
	This spreadsheet contains supplemental data on MethaneSAT estimated methane emissions for each of the 34 regions included in this study
	The following are the attribute definitions:
	domain_file_name: corresponds to the .geojson file name
	region_name: name of region
	country: country in which region is located
	nuber_of_acquisitions: total number of MethaneSAT acquisiitons included in the aggregated data
	msat_total_kg_h: MethaneSAT total methane emissions (all sources included)
	msat_oil_gas_kg_h: MethaneSAT oil and gas methane emissions in kg per hour
	msat_oil_gas_kg_h_lb: Lower bound estimate (2.5th percentile) of MethaneSAT oil and gas methane emissions
	msat_oil_gas_kg_h_ub: Upper bound estimates (97.5th percentile) of MethaneSAT oil and gas methane emissions
	gas_intensity: Mean gas-normalized methane intensity (relative to marketed gas production, %)
	gas_intensity_lb: Lower bound (2.5th percentile) of the gas-normalized methane intensity (%)
	gas_intensity_ub: Upper bound (97.5th percentile) of the gas-normalized methane intensity (%)
	energy_intensity: energy-normalized methane intensity, relative to total oil and gas production, kg per gigajoule
	energy_intensity_lb: Lower-bound (2.5th percentile) on mean energy-normalized methane intensity, kg per gigajoule
	energy_intensity_ub: Upper-bound (97.5th percentile) on the mean energy-normalized methane intensity, kg per gigajoule
	gas_flaring_2024_bcm: Estimated gas flaring volumes, billion cubic meters (bcm) in 2024
	basin_area_km2: domain area in square kilometers
	CAMS_oilgas_t_hr: Mean total oil and gas methane emissions from the CAMS inventory, tonnes per hour
	scarpelli_oilgas_t_hr_adjusted: Mean total oil and gas methane emissions from the GFEI v3 inventory, adjusted from 2020 to 2024 estimates (see Methods), tonnes per hour
	Citation: Omara et al. Satellite-derived methane emissions reveal persistent gaps in global oil and gas mitigation performance
	Correspondence to: Mark Omara, momara@edf.org

## Sheet: data
idx	domain_file_name	region_name	country	number_of_acquisitions	msat_total_kg_h	msat_oil_gas_kg_h	msat_oil_gas_kg_h_lb	msat_oil_gas_kg_h_ub	gas_intensity	gas_intensity_lb	gas_intensity_ub	energy_intensity	energy_intensity_lb	energy_intensity_ub	gas_flaring_2024_bcm	basin_area_km2	CAMS_oilgas_t_hr	scarpelli_oilgas_t_hr_adjusted	prod_category
1	AMU_DARYA_area_weighted_flux_062_domain	Amu Darya - TKM	Turkmenistan	9	170700	66300	45100	89400	1.5424	1.0479	2.07845	0.274128	0.186242	0.369399	0.31061	77082.1	24.765	27.5596	Predominantly gas
2	AMU_DARYA_area_weighted_flux_066_067_domain	Amu Darya - UZB	Uzbekistan	10	226700	197200	123100	271600	4.78035	2.98403	6.58524	0.836766	0.522333	1.1527	0.52953	101015	147.501	77.634	Predominantly gas
3	APPALACHIAN_area_weighted_flux_002_064_068_domain	Appalachian - USA	United States	3	216400	177500	118000	238400	1.03441	0.687973	1.38955	0.181545	0.120744	0.243876	0.01545	101276	19.8666	76.0266	Predominantly gas
4	ASSAM_area_weighted_flux_302_domain	Assam - IND	India	3	140600	31200	20900	42400	8.79434	5.89795	11.9817	0.770332	0.516625	1.04952	0.51549	48589.2	23.5583	8.21607	Mixed oil and gas
5	BOWEN-SURAT_area_weighted_flux_042_domain	Bowen Surat - AUS	Australia	7	114900	4500	100	10900	0.250337	0.00563917	0.611815	0.0454452	0.00102371	0.111067	0.00416	75545.2	6.94897	1.58507	Predominantly gas
6	EAGLE_FORD_area_weighted_flux_085_090_US_domain	Eagle Ford - USA	United States	5	191400	139100	88500	188400	2.3209	1.47756	3.14358	0.22813	0.145235	0.308994	1.07785	109963	95.1807	42.7273	Mixed oil and gas
7	GREATER_GREEN_RIVER_area_weighted_flux_217_domain	Greater Green River - USA	United States	2	23400	8200	3700	13100	4.21286	1.88365	6.6963	0.423592	0.189396	0.673296	0.05961	39157.3	4.15395	8.1229	Mixed oil and gas
8	HAYNESVILLE-BOSSIER_area_weighted_flux_095_domain	Haynesville - USA	United States	2	126600	96300	58200	132800	0.876988	0.529773	1.20937	0.156202	0.0943589	0.215402	0.08889	62387.1	21.9095	45.2646	Predominantly gas
9	ILLIZI-GHADAMES_area_weighted_flux_086_089_domain	Illizi - ALG	Algeria	4	68400	58500	35500	81300	3.1331	1.89798	4.34842	0.345794	0.209476	0.479927	2.183	96419.2	85.6701	19.289	Mixed oil and gas
10	JUNGGAR_area_weighted_flux_118_domain	Junggar - CHN	China	2	55600	18800	9100	28000	11.7901	5.68777	17.5346	0.265911	0.128281	0.39547	0.14041	69217	14.4734	10.5072	Predominantly oil
11	MOESIAN_PLATFORM_area_weighted_flux_116_domain	Moesian - ROM	Romania	2	63800	3900	2300	6100	2.16687	1.24693	3.37055	0.285801	0.164464	0.44456	0.00468	43604	1.11269	2.48107	Mixed oil and gas
12	MSAT_TARGET_044_DATE_2025_03_31_ID_09F102C0_domain	Comalcalco - MEX	Mexico	1	72400	20800	9800	31600	5.52864	2.61007	8.39579	0.20512	0.0968371	0.311495	1.8808	35746.8	10.3488	15.8008	Mixed oil and gas
13	MSAT_TARGET_079_DATE_2025_01_14_ID_064C04F0_domain	Maturin - VEN	Venezuela	1	234500	188900	128300	269400	81.0013	55.0184	115.525	2.33103	1.5833	3.32453	7.55678	44039.3	39.3165	23.8791	Predominantly oil
14	MSAT_TARGET_299_DATE_2025_06_09_ID_0D3112B0_domain	Duvernay - CAN	Canada	1	43900	5700	2400	10300	2.74561	1.15972	5.00365	0.279915	0.118233	0.510122	0.00408	48785.5	2.53403	6.11627	Mixed oil and gas
15	NEPA-BOTUOBA_area_weighted_flux_136_domain	Nepa-Botuba - RUS	Russia	2	123700	113200	54400	172700	6.82376	3.27993	10.4091	0.651217	0.313016	0.993379	0.89191	53077.1	4.20028	2.26084	Mixed oil and gas
16	NEUQUEN_area_weighted_flux_040_041_domain	Neuquen - ARG	Argentina	2	93700	86100	42300	126400	3.44379	1.69412	5.0592	0.342506	0.168491	0.503169	1.28983	110155	53.4756	21.9392	Mixed oil and gas
17	ORDOS_area_weighted_flux_105_108_109_domain	Ordos - CHN	China	7	363100	27200	15200	38500	0.817598	0.45722	1.15753	0.115513	0.0645974	0.16354	0.16815	137278	9.25478	4.28409	Mixed oil and gas
18	OUED_MYA_area_weighted_flux_054_058_domain	Oued Mya - ALG	Algeria	9	77900	76600	45400	108500	11.2101	6.64981	15.8828	0.37553	0.222763	0.53206	3.31612	150459	72.8921	17.3934	Predominantly oil
19	PERMIAN_area_weighted_flux_005_006_056_057_061_domain	Permian - USA	United States	20	476500	342200	253300	430000	1.73	1.28049	2.17391	0.132177	0.0978334	0.166093	5.56085	186320	223.336	157.477	Mixed oil and gas
20	POWDER_RIVER_area_weighted_flux_115_domain	Powder River - USA	United States	3	109700	40200	23000	58300	5.26404	3.01443	7.63949	0.437676	0.250633	0.635182	0.09281	67954.2	5.57236	37.3971	Mixed oil and gas
21	RUB_AL_KHALI_area_weighted_flux_008_046_047_048_049_OMAN_domain	Rub Al Khali - OMN	Oman	8	56800	52700	30600	74600	1.6916	0.980841	2.39536	0.162357	0.0941396	0.229903	1.18399	124775	67.1609	15.3085	Mixed oil and gas
22	RUB_AL_KHALI_area_weighted_flux_008_046_047_048_049_UAE_domain	Rub Al Khali - UAE	UAE	8	26300	21500	7200	39400	3.36985	1.12278	6.18252	0.0335695	0.0111848	0.0615884	0.30466	48845.7	64.8564	152.137	Predominantly oil
23	SAHARA_area_weighted_flux_059_domain	Hassi R'Mel - ALG	Algeria	4	30400	29700	16900	42900	0.865281	0.490683	1.2489	0.137054	0.0777202	0.197815	0.78059	62610.9	37.6961	27.2516	Predominantly gas
24	SAN_JOAQUIN_area_weighted_flux_100_159_domain	San Joaquin - USA	United States	9	176200	21800	13800	30200	6.62916	4.20111	9.19017	0.288941	0.183111	0.400566	0.02484	76109.9	4.76884	12.8417	Mixed oil and gas
25	SOUTH_CASPIAN_area_weighted_flux_011_065_domain	South Caspian - TKM	Turkmenistan	3	385300	367300	259300	472900	175.012	123.564	225.342	12.5357	8.85063	16.1408	0.52743	34935.9	43.806	58.5441	Mixed oil and gas
26	SOUTH_CASPIAN_area_weighted_flux_038_domain	South Caspian - AZB	Azerbaijan	3	36600	19400	8900	34200	183.996	84.8738	325.303	3.13692	1.447	5.54606	0.0417	15906.4	29.1998	42.0868	Predominantly oil
27	TARIM_area_weighted_flux_112_113_domain	Tarim - CHN	China	3	56300	28900	13500	44900	1.27664	0.595364	1.98208	0.199783	0.0931691	0.310177	0.11701	72845.6	60.4032	4.02125	Predominantly gas
28	UINTA_area_weighted_flux_110_213_214_domain	Uinta - USA	United States	11	75000	32000	17000	49300	3.99669	2.11736	6.14704	0.369739	0.19588	0.56867	0.11016	79347.8	16.4399	17.4933	Mixed oil and gas
29	WESTERN_DESERT_area_weighted_flux_091_domain	Western Desert - EGY	Egypt	2	35800	34900	18400	53600	7.75059	4.0802	11.908	0.564548	0.297199	0.867369	0.8844	47757.7	34.5661	10.0795	Mixed oil and gas
30	WIDYAN-NORTH_ARABIAN_GULF_area_weighted_flux_009_050_051_domain	Widyan - KSA	Saudi Arabia	10	82300	49900	27600	72900	1.31522	0.728307	1.92007	0.0294218	0.0162925	0.0429526	1.34098	115105	141.289	22.7234	Predominantly oil
31	WIDYAN-NORTH_ARABIAN_GULF_area_weighted_flux_053_domain	Widyan - KUW	Kuwait	3	55600	27000	12900	42400	1.4811	0.706672	2.3233	0.0272881	0.0130199	0.042805	3.84307	42219.4	122.11	58.2296	Predominantly oil
32	WIDYAN-NORTH_ARABIAN_GULF_area_weighted_flux_055_domain	Widyan - IRN_IRQ	Iran and Iraq	4	182500	151100	91500	211800	9.44179	5.71577	13.2318	0.110644	0.0669804	0.155058	17.7584	69696.8	327.072	369.837	Predominantly oil
33	WIDYAN-NORTH_ARABIAN_GULF_area_weighted_flux_099_domain	Widyan - IRQ	Iraq	3	69200	56700	21700	95300	39.5534	15.1306	66.4818	0.860072	0.329009	1.44562	2.06096	56311.9	103.86	59.4118	Predominantly oil
34	ZAGROS_FOLDBELT_area_weighted_flux_092_domain	Zagros Foldbelt - IRN	Iran	3	172300	148100	96600	197500	21.097	13.7651	28.1377	0.256779	0.16754	0.342475	10.7019	33498.9	275.641	291.83	Predominantly oil
